# Supplementary material for: Programming and Isolation of Highly Pure Physiologically and Pharmacologically Functional Sinus-Nodal Bodies from Pluripotent Stem Cells
Source: PubMed Central journal article supplement — Stem Cell Reports. 2014 Apr 17;2(5):592–605. doi: 10.1016/j.stemcr.2014.03.006 (PMC4050488; doi:10.1016/j.stemcr.2014.03.006), 2014-04-17
Supplement: mmc1.pdf [file mmc1.pdf]

## **Stem Cell Reports, Volume 2**

### **Supplemental Information**

#### **Programming and Isolation of Highly Pure Physiologically and Pharmacologically Functional Sinus-Nodal Bodies from Pluripotent Stem Cells**

Julia Jeannine Jung, Britta Husse, Christian Rimmbach, Stefan Krebs, Juliane Stieber, Gustav Steinhoff, Andreas Dendorfer, Wolfgang-Michael Franz, and Robert David

## **Supplementary Material**

### **Suppl. Table 1: Action potential parameters of cardiomyocytes derived from Tbx3 programmed cells. Related to Figure 4**

Data are mean  $\pm$  SD.

| AP-Type                 | MDB (mV)            | DDR (mV/s)          | Overshoot (mV)     | APD (ms)             | Cyclelength (ms)     | Plateau (ms)         |
|-------------------------|---------------------|---------------------|--------------------|----------------------|----------------------|----------------------|
| Ventricular (n=9)       | -50.2<br>$\pm$ 11.8 | 10.5<br>$\pm$ 7.5   | 35.8<br>$\pm$ 5.8  | 319.2<br>$\pm$ 134.9 | 896.2<br>$\pm$ 552.5 | 164.5<br>$\pm$ 108.4 |
| Atrial (n=3)            | -53.9<br>$\pm$ 4.7  | 13.5<br>$\pm$ 18.2  | 40.6<br>$\pm$ 0.05 | 165.9<br>$\pm$ 66.6  | 650.6<br>$\pm$ 296.7 | 78.5<br>$\pm$ 48.0   |
| Pacemaker system (n=15) | -47.9<br>$\pm$ 4.7  | 105.0<br>$\pm$ 37.6 | 20.5<br>$\pm$ 10.7 | 203.6<br>$\pm$ 96.1  | 342.2<br>$\pm$ 130.2 | --                   |
| Intermediate (n=12)     | -50.5<br>$\pm$ 6.1  | 52.8<br>$\pm$ 20.5  | 30.5<br>$\pm$ 14.6 | 210.4<br>$\pm$ 98.4  | 378.7<br>$\pm$ 123.3 | 66.4<br>$\pm$ 29.5   |

### **Suppl. Table 2: Action potential parameters of cardiomyocytes derived from control cells. Related to Figure 4**

Data are mean  $\pm$  SD.

| AP-Type                | MDB (mV)           | DDR (mV/s)         | Overshoot (mV)    | APD (ms)            | Cyclelength (ms)     | Plateau (ms)        |
|------------------------|--------------------|--------------------|-------------------|---------------------|----------------------|---------------------|
| Ventricular (n=13)     | -73.7<br>$\pm$ 4.2 | 3.8<br>$\pm$ 2.4   | 28.8<br>$\pm$ 5.5 | 241.1<br>$\pm$ 35.8 | 1133<br>$\pm$ 354.2  | 178.5<br>$\pm$ 35.3 |
| Atrial (n=3)           | -73.4<br>$\pm$ 7.6 | 4.1<br>$\pm$ 1.4   | 22.8<br>$\pm$ 4.0 | 130.7<br>$\pm$ 44.0 | 1244<br>$\pm$ 126.9  | 83.0<br>$\pm$ 14.5  |
| Pacemaker system (n=6) | -57.2<br>$\pm$ 4.6 | 99.5<br>$\pm$ 16.5 | 9.8<br>$\pm$ 2.8  | 129.8<br>$\pm$ 19.3 | 567.3<br>$\pm$ 61.7  | --                  |
| Intermediate (n=7)     | -61.1<br>$\pm$ 7.4 | 48.2<br>$\pm$ 5.7  | 23.5<br>$\pm$ 9.0 | 203.3<br>$\pm$ 58.9 | 566.4<br>$\pm$ 248.7 | 59.7<br>$\pm$ 25.1  |

### **Suppl. Table 3: Action potential parameters of cardiomyocytes derived from iSABs. Related to Figure 4**

Data are mean  $\pm$  SD.

| AP-Type                       | MDB (mV)           | DDR (mV/s)           | Overshoot (mV)     | APD (ms)            | Cyclelength (ms)     | Plateau (ms)       |
|-------------------------------|--------------------|----------------------|--------------------|---------------------|----------------------|--------------------|
| Mat. Pacemaker system (n=43)  | -54.7<br>$\pm$ 3.7 | 116.7<br>$\pm$ 85.3  | 21.6<br>$\pm$ 7.6  | 86.2<br>$\pm$ 28.2  | 197.4<br>$\pm$ 63.2  | --                 |
| Early Pacemaker system (n=10) | -60.4<br>$\pm$ 3.5 | 108.8<br>$\pm$ 102.0 | 28.7<br>$\pm$ 24.1 | 114.5<br>$\pm$ 97.4 | 263.3<br>$\pm$ 154.7 | 33.7<br>$\pm$ 32.6 |

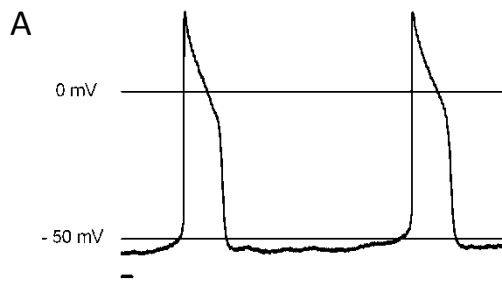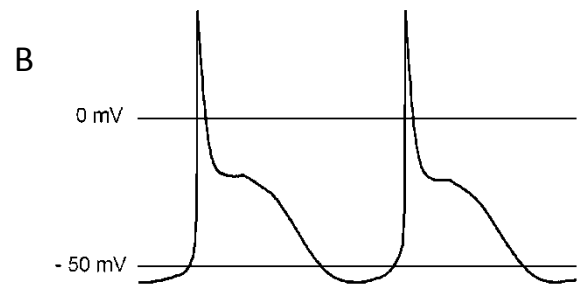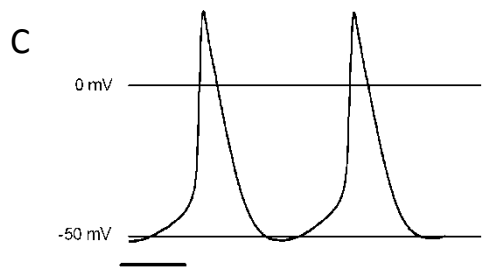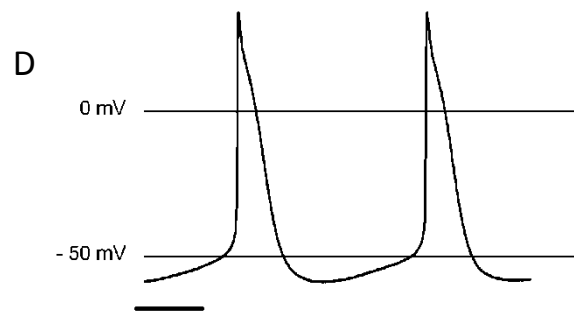

**Suppl. Fig. 1: Representative Action Potentials derived from Tbx3 programmed cells. Related to Figure 4**

(A, B) Myocardial types with (A) ventricular-like and (B) atrial-like action potentials. (C, D) Pacemaker type action potentials, with (C) mature sinoatrial-like action potentials and (D) slightly immature pacemaker-like cells referred to as intermediate type cells of the murine embryonic heart. Horizontal time bar: 100 ms.

A

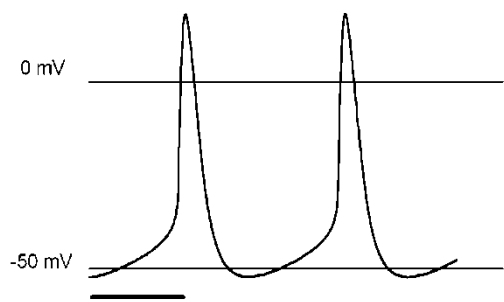

B

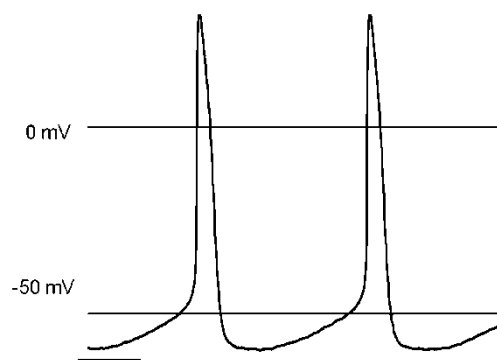

**Suppl. Fig. 2: Representative Action Potentials derived from iSAB-cardiomyocytes. Related to Figure 4**

(A) Pacemaker type action potentials resembling action potentials generated by adult murine sinoatrial node cells. (B) action potentials generated by slightly immature pacemaker-like cells. Horizontal time bar: 100 ms.

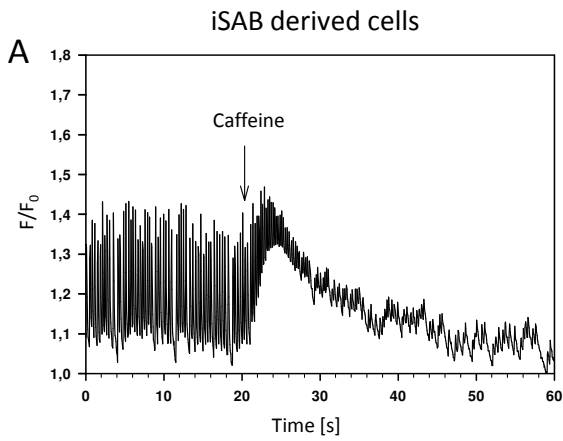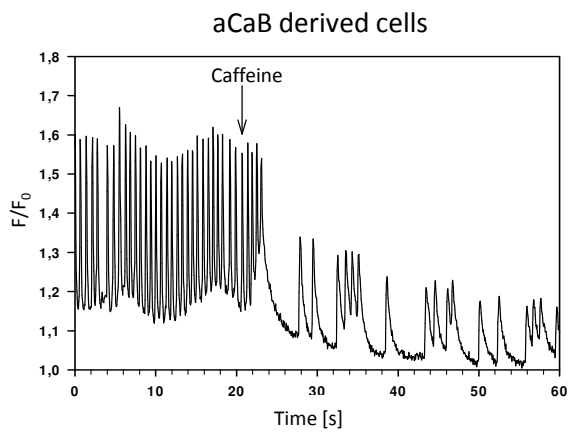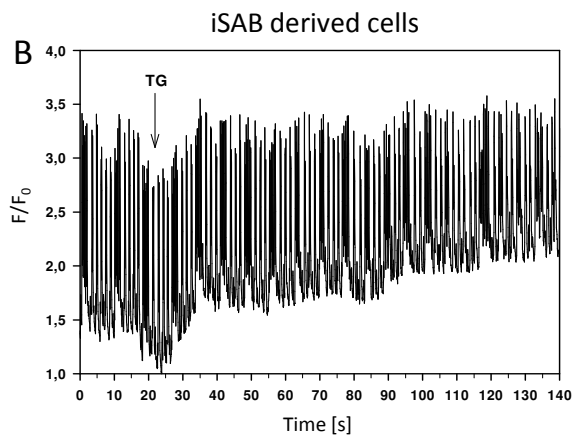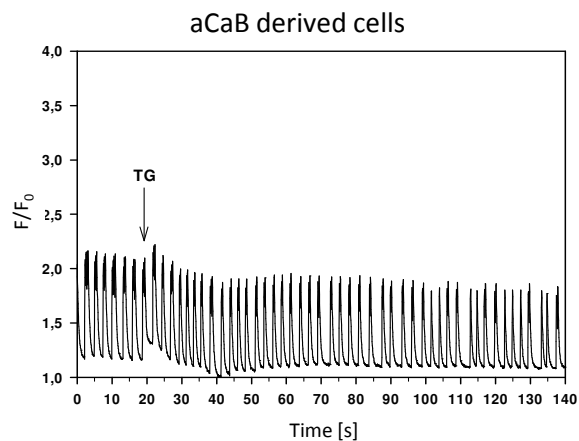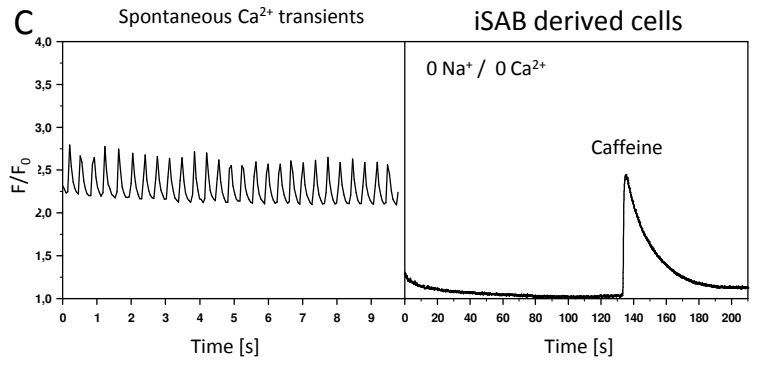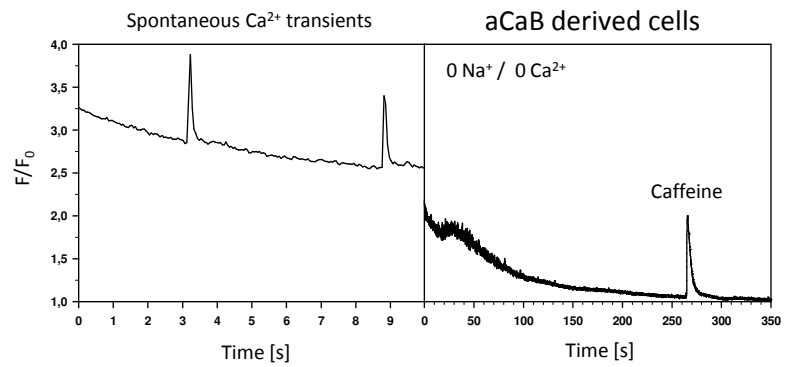

**Replacement of extracellular  $Na^+$  by  $Li^+$  and  $Ca^{2+}$  by EGTA**

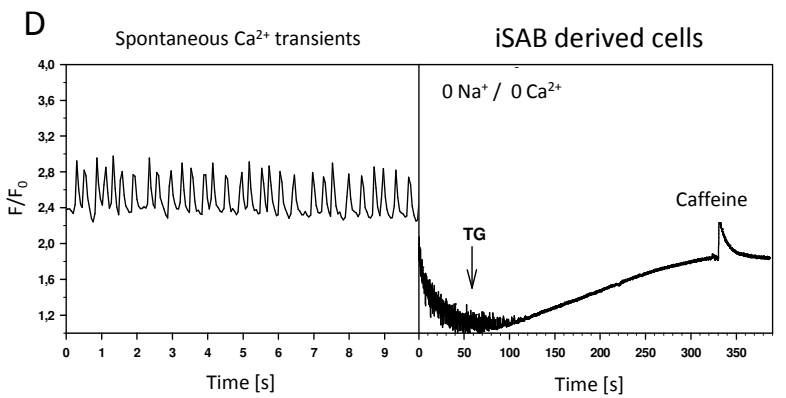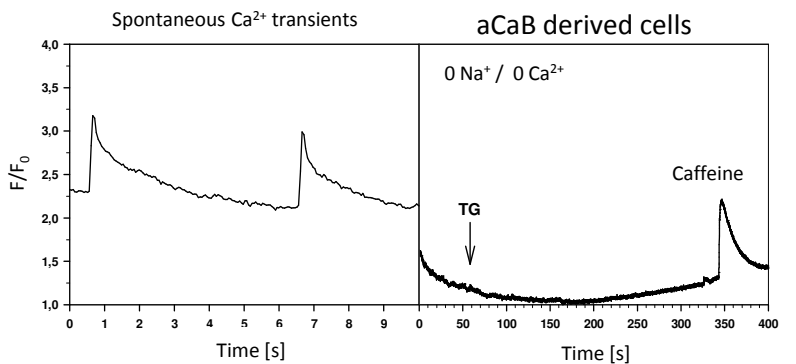

**Suppl. Fig. 3: Calcium Characteristics of pacemaker-like cardiomyocytes obtained from iSABs. Related to Figure 5**

(A) Spontaneous  $\text{Ca}^{2+}$ -transients before and in the presence of 10 mM Caffeine in iSAB and aCaB derived cells. The amplitude of the Caffeine-induced peak in the former is comparable to the maxima of spontaneous  $\text{Ca}^{2+}$ -transients.  $n \geq 8$  (B) Blockage of  $\text{Ca}^{2+}$  uptake into the SR via Thapsigargin leads to increased diastolic  $\text{Ca}^{2+}$  levels in iSAB derived as opposed to aCaB derived cells.  $n \geq 11$ . (C)  $\text{Ca}^{2+}$ -transients before and after blockage of the  $\text{Na}^+ / \text{Ca}^{2+}$  exchanger and sarcolemmal  $\text{Ca}^{2+}$  channels: a large caffeine peak is observed in iSAB derived cells as opposed to aCaB derived cells.  $n > 16$ . (D)  $\text{Ca}^{2+}$  transients before and after inhibition of  $\text{Ca}^{2+}$  uptake:  $\text{Na}^+ / \text{Ca}^{2+}$  exchanger inhibition plus SERCA inhibition causes a rapid increase of intracellular  $\text{Ca}^{2+}$  in iSAB derived cells as opposed to aCaB derived cells.  $n > 24$ . In addition, a small Caffeine peak appears in each case.



**Suppl. Movie 1 Related to Figure 3**

Increased and more vigorous spontaneous beating activity in EBs derived from TBX3 programmed cells combined with *Myh6*-promoter based antibiotic selection; Beating rate: 194 beats per min.

**Suppl. Movie 2 Related to Figure 3**

Controls related to Suppl Movie 3: unprogrammed cells after *Myh6*-promoter based antibiotic selection; Beating rate: 86 beats per min.

**Suppl. Movie 3 Related to Figure 3**

Typical induced sinoatrial bodies (iSABs) after additional decollating.

**Suppl. Movie 4 Related to Figure 3**

Highly synchronized cell layer beating at >350 beats per minute after further cultivation of iSABs on gelatine coated dishes for three weeks. Synchronisation was analysed via Keyence VW9000 Motion Analyser software.

**Suppl Movie 5 Related to Figure 3**

Typical beating spindle and spider cells derived from iSABs.

**Suppl. Movie 6 Related to Figure 5**

Calcium transients recorded from a typical iSAB.

**Suppl. Movie 7 Related to Figure 6**

Pacing of host slice tissue via an iSAB. The identical iSAB is shown in Fig. 6E demonstrating transmission of Calcein dye over time. ~30 beats per min are achieved in the host slice as compared to a maximum of ~60 beats per min via electrode stimulation.

**Suppl. Movie 8 Related to Figure 6**

iSAB based stimulation of adjacent slice regions leads to synchronized  $\text{Ca}^{2+}$  transients as evident from Fluo-4/AM imaging. Please refer to Fig. 6F and 6G, showing the identical iSAB, for detailed analysis.
